# Supplementary material for: High energy density supercapacitors composed of nickel cobalt oxide nanosheets on nanoporous carbon nanoarchitectures
Source: Royal Society of Chemistry journal article supplement (doi:10.1039/c7ta01362k), 2017-01-01
Supplement: c7ta01362k1.pdf [file c7ta01362k1.pdf]

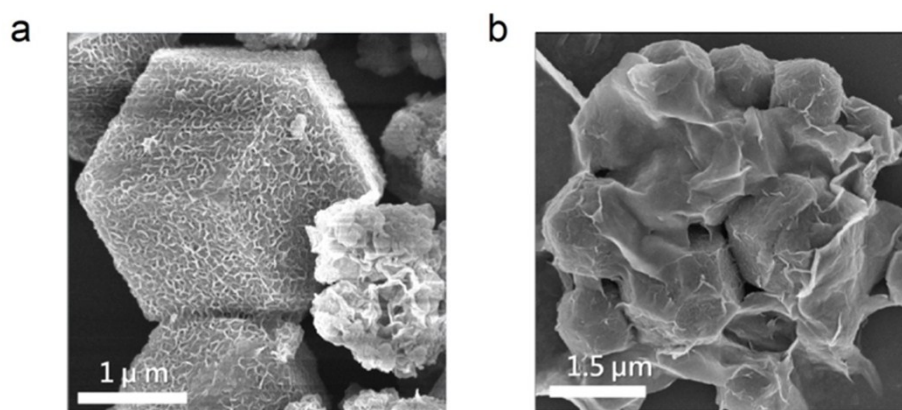

**Figure S1** The SEM images of NiCo<sub>2</sub>O<sub>4</sub>-NC (a) without acid surface treatment and (b) without use of TSC.

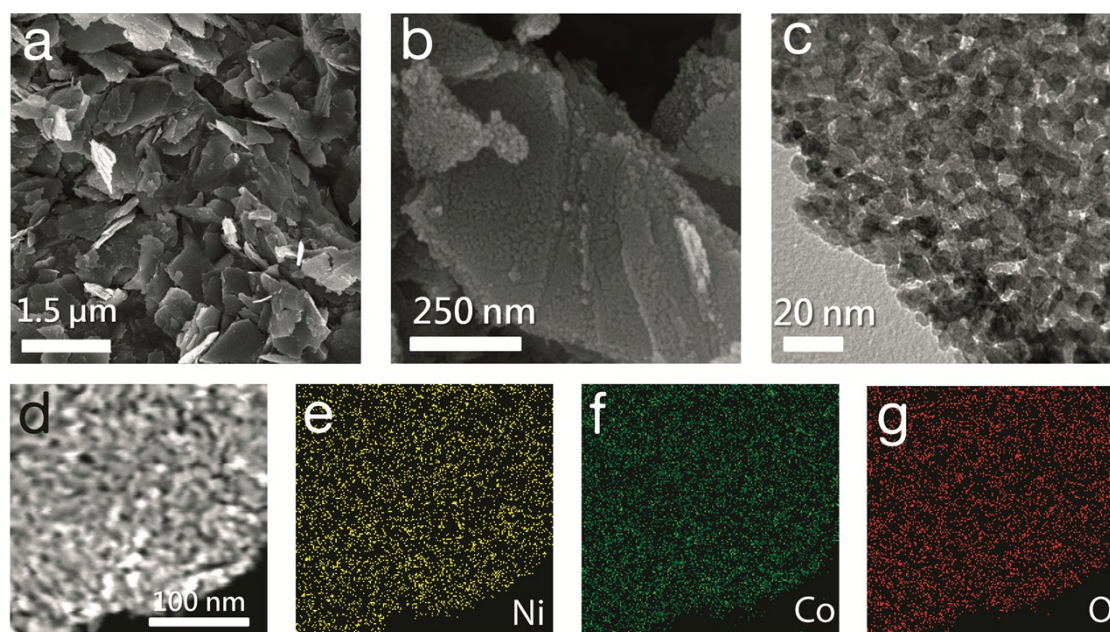

**Figure S2** (a) Low-magnification SEM image, (b) high-magnification SEM image, (c) TEM image, and (d-g) EDS elemental mapping for bare NiCo<sub>2</sub>O<sub>4</sub>. The compositional ratio of Ni:Co is almost 1:2.

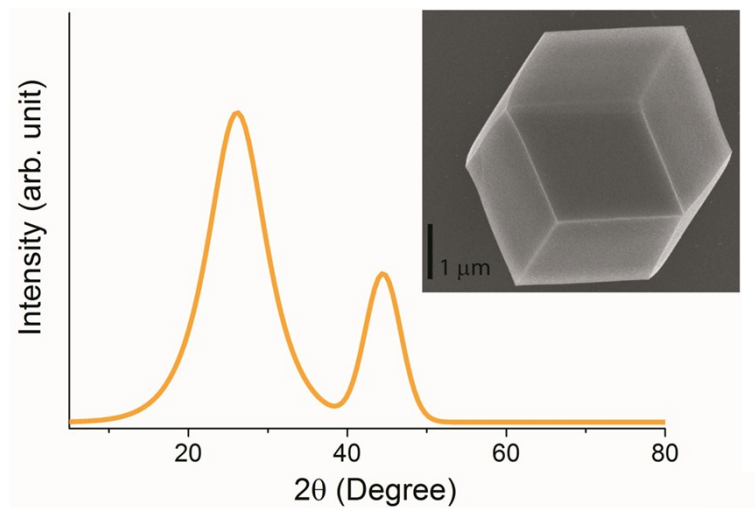

**Figure S3** Wide-angle XRD pattern for NC. The inset image shows SEM image of single NC particle.

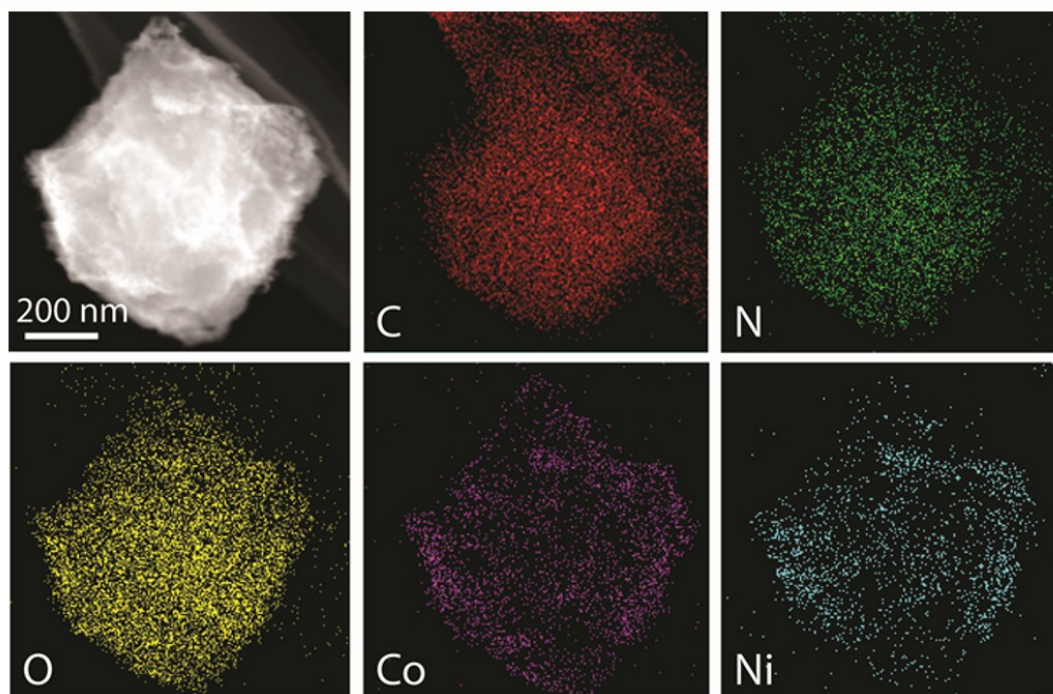

**Figure S4** HAADF-STEM image and EDS elemental mapping for carbon, nitrogen, oxygen, cobalt and nickel in  $\text{NiCo}_2\text{O}_4$ -NC sample.

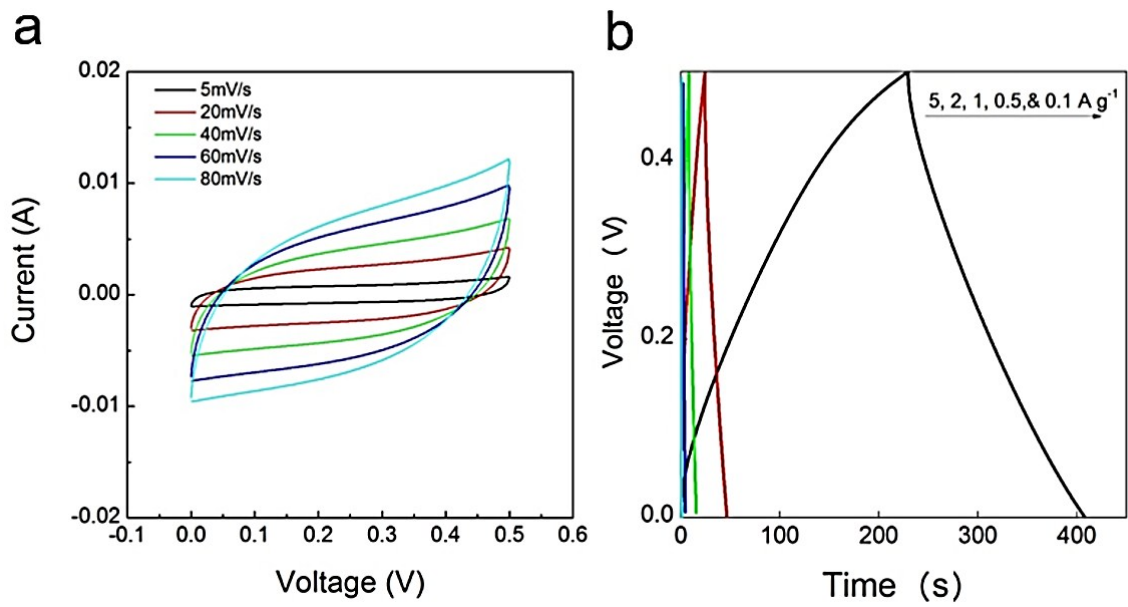

**Figure S5** (a) CVs at scan rates from 5 to 80  $\text{mV}\cdot\text{s}^{-1}$  and (b) charge-discharge curves for the NiCo<sub>2</sub>O<sub>4</sub>-NC/NiCo<sub>2</sub>O<sub>4</sub>-NC SSC device at the current densities ranging from 0.1 to 5  $\text{A}\cdot\text{g}^{-1}$ .

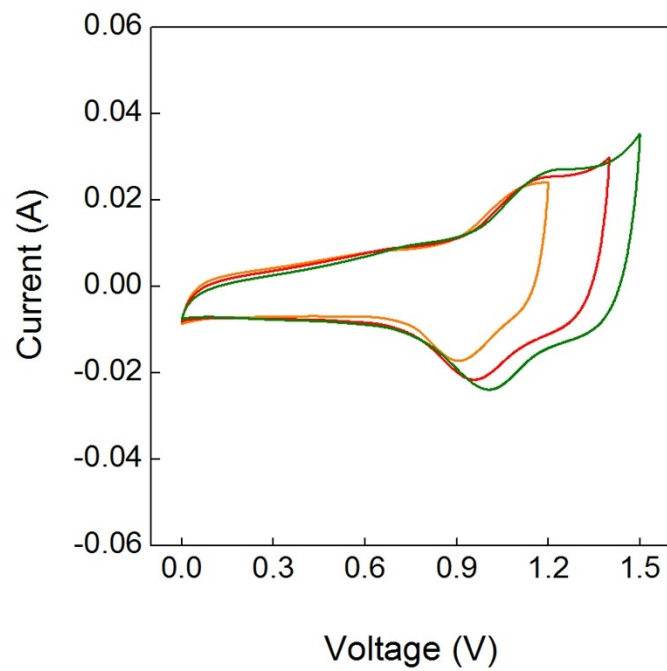

**Figure S6** Potential window variation for the upper potential windows ranging from 1.2 V to 1.5 V for ACS.

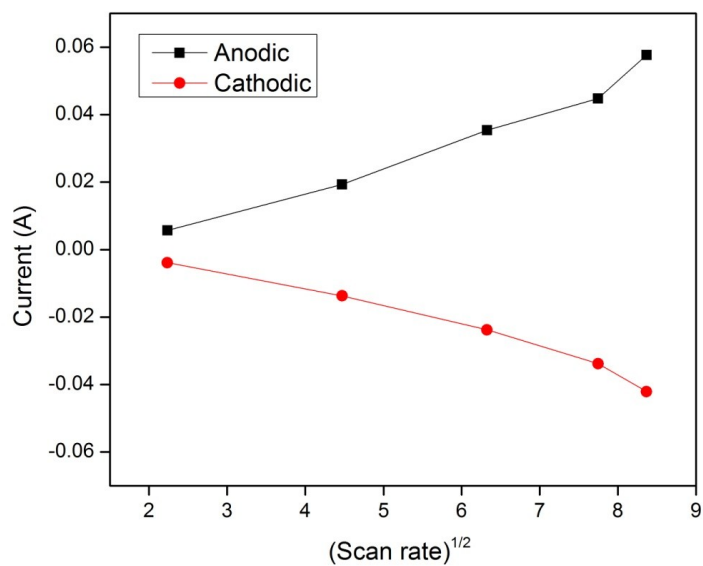

**Figure S7** Peak current as a function of the square root of the scan rate for the ASC device.

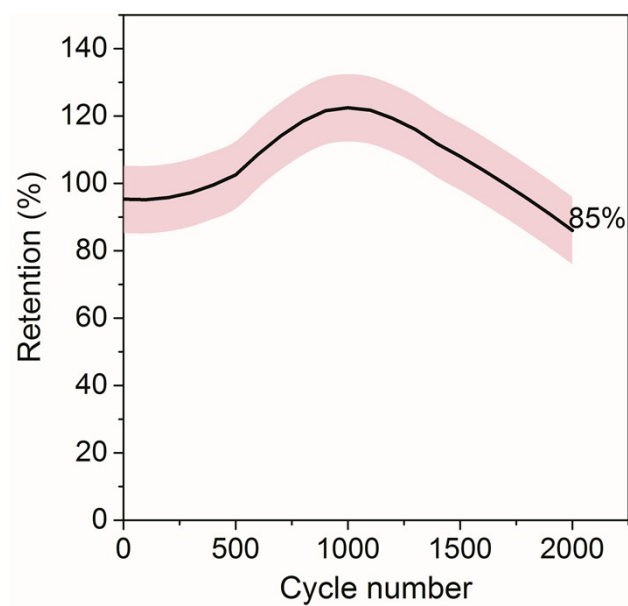

**Figure S8** Stability test of NiCo<sub>2</sub>O<sub>4</sub>-NC//NC ASC device up to 2000 repeated cycles. The error bars are shown by pink color in background.

**Table S1** Comparison of the electrochemical performance of our sample with those reported in the literature that use standard three-electrode setups.

| Sample name                                                        | Current Density<br>(A·g <sup>-1</sup> ) | Scan rate<br>(mV·s <sup>-1</sup> ) | Specific Capacitance<br>(F·g <sup>-1</sup> ) | Electrolyte | Refs         |
|--------------------------------------------------------------------|-----------------------------------------|------------------------------------|----------------------------------------------|-------------|--------------|
| NiCo <sub>2</sub> O <sub>4</sub> -NC                               | -                                       | 5                                  | 310                                          | 6M KOH      | Present work |
| Hollow NiCo <sub>2</sub> O <sub>4</sub> flowerlike microstructures | 1                                       | -                                  | 387                                          | 3M KOH      | S1           |
| Nickel cobaltite grown on carbon cloth                             | 1                                       | -                                  | 245                                          | 1 M KOH     | S2           |
| Porous hexagonal NiCo <sub>2</sub> O <sub>4</sub> nanoplates       | 1                                       | -                                  | 294                                          | 1 M KOH     | S3           |

**Table S2** Comparison of specific capacitance of our sample with literature reports using two-electrode setups.

| Sample name                               | Current Density<br>(A·g <sup>-1</sup> ) | Scan rate<br>(mV·s <sup>-1</sup> ) | Specific Capacitance<br>(F·g <sup>-1</sup> ) | Electrolyte | Refs         |
|-------------------------------------------|-----------------------------------------|------------------------------------|----------------------------------------------|-------------|--------------|
| NiCo <sub>2</sub> O <sub>4</sub> -NC//NC  | 0.1                                     | -                                  | 89.0                                         | 1 M KOH     | Present work |
| NiO//carbon                               | -                                       | 1                                  | 37.0                                         | 6 M KOH     | S4           |
| NiCo <sub>2</sub> O <sub>4</sub> -rGO//AC | 0.5                                     | -                                  | 99.4                                         | 2 M KOH     | S5           |
| porous Ni//AC                             | -                                       | 2                                  | 34.0                                         | 6 M KOH     | S6           |

**Table S3** Comparison of the ED and PD performance of our ASC device with literature reports using two electrode device configurations.

| Materials                                     | Operating voltage (V) | Energy density (W·h·kg <sup>-1</sup> ) | Power density (W·kg <sup>-1</sup> ) | Device type                      | Ref.         |
|-----------------------------------------------|-----------------------|----------------------------------------|-------------------------------------|----------------------------------|--------------|
| NiCo <sub>2</sub> O <sub>4</sub> -NC//NC      | 1.5                   | 14.6                                   | 70.0                                | HS test cell                     | Present work |
| NiO//carbon                                   | 1.5                   | 11.7                                   | 28.3                                | Sandwich-type two electrode cell | S4           |
| NiCo <sub>2</sub> O <sub>4</sub> -rGO//AC     | 1.4                   | 23.3                                   | 324.9                               | Coin cell                        | S5           |
| Ni <sub>x</sub> Co <sub>1-x</sub> LDH-ZTO//AC | 1.2                   | 23.7                                   | 284.2                               | Swagelok cell                    | S7           |
| rGO//rGO                                      | 1.2                   | 6.7                                    | 7.6                                 | Beaker cell                      | S8           |
| NC//NC carbon                                 | 1.4                   | 14.6                                   | 70.0                                | HS test cell                     | S9           |

## References

- S1. H. S. Zheng, Y. H. Ni, F. Y. Wan and X. Ma, *RSC Adv.*, 2015, **5**, 31558-31565.
- S2. G. X. Gao, H. B. Wu and X. W. Lou, *Adv. Energy Mater.*, 2014, **4**, 1400422.
- S3. J. Pu, J. Wang, X. Q. Jin, F. L. Cui, E. H. Sheng and Z. H. Wang, *Electrochim. Acta*, 2013, **106**, 226-234.
- S4. D. W. Wang, F. Li and H. M. Cheng, *J. Power Sources*, 2008, **185**, 1563-1568.
- S5. X. Wang, W. S. Liu, X. H. Lu and P. S. Lee, *J. Mater. Chem.*, 2012, **22**, 23114-23119.
- S6. V. Ganesh, S. Pitchumani and V. Lakshminarayanan, *J. Power Sources*, 2006, **158**, 1523-1532.
- S7. X. Wang, A. Sumboja, M. F. Lin, J. Yan and P. S. Lee, *Nanoscale*, 2012, **4**, 7266-7272.
- S8. H. L. Wang, Y. Y. Liang, T. Mirfakhrai, Z. Chen, H. S. Casalongue and H. J. Dai, *Nano Res.*, 2011, **4**, 729-736.
- S9. C. Young, R. R. Salunkhe, J. Tang, C. C. Hu, M. Shahabuddin, E. Yanmaz, M. S. A. Hossain, J. H. Kim and Y. Yamauchi, *Phys. Chem. Chem. Phys.*, 2016, **18**, 29308-29315.
